# Supplementary material for: Multilayered upconversion nanocomposites with dual photosensitizing functions for enhanced photodynamic therapy
Source: Royal Society of Chemistry journal article supplement (doi:10.1039/c7tb01968h), 2017-01-01
Supplement: c7tb01968h1.pdf [file c7tb01968h1.pdf]

## Supporting Information

### Multilayered upconversion nanocomposites with dual photosensitizing functions for enhanced photodynamic therapy

Siyang Liu, Ye Yuan, Yingkun Yang, Zhihe Liu, Shengyan Yin, Weiping Qin, and Changfeng Wu\*

College of Electronic Science and Engineering, Jilin University, 2699 Qianjin Street, Changchun 130012, China

\*Corresponding author: e-mail ID: [wucf@sustc.edu.cn](mailto:wucf@sustc.edu.cn)

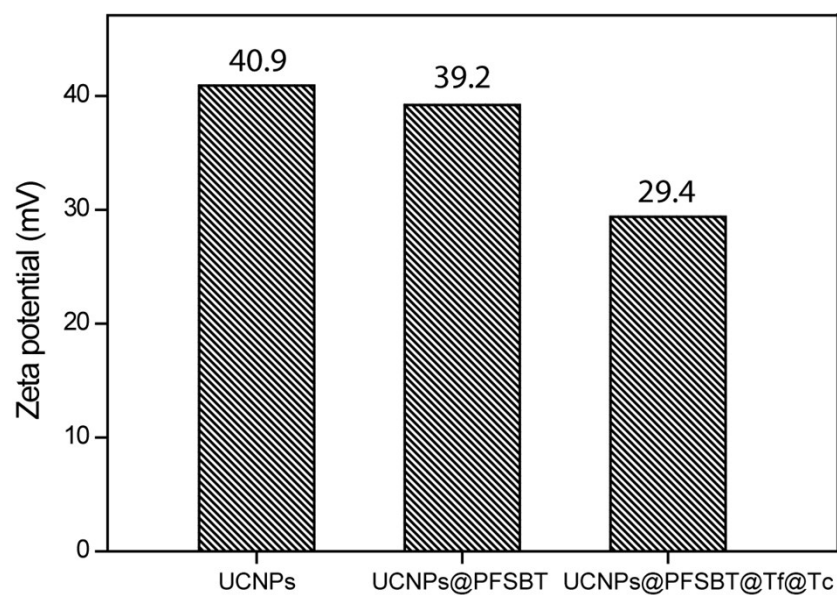

Fig. S1 Zeta potential of UCNPs, UCNPs@PFSBT, UCNPs@PFSBT@Tf@Tc.



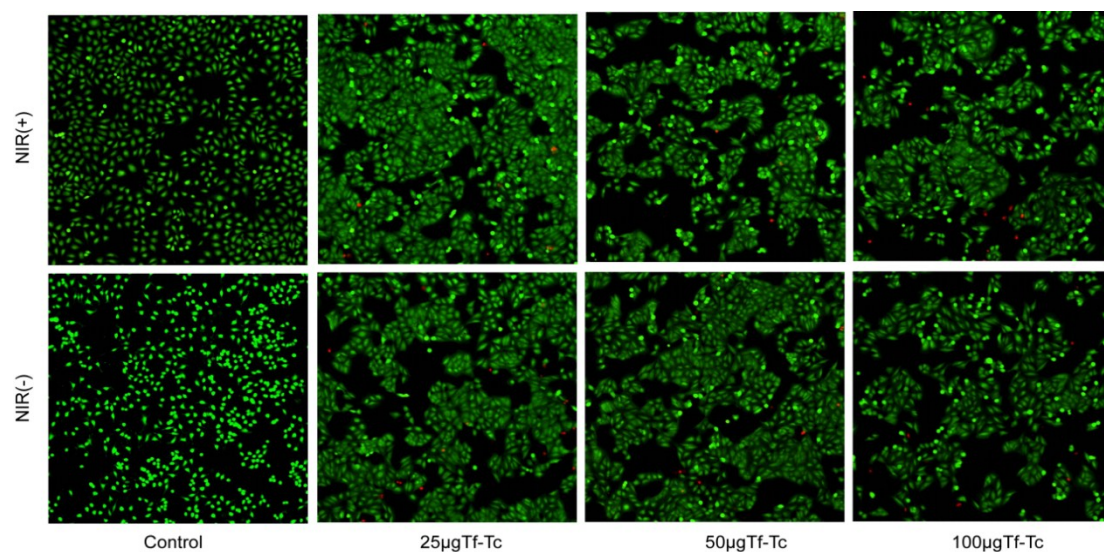

Fig. S2 Confocal images of MCF-7 cells incubated without and with Tf-Tc and then co-stained with Calcein-AM and PI after treatment with 980 nm laser irradiation ( $0.6 \text{ W cm}^{-2}$ ) for 0 min (NIR-) and 20 min (NIR+). The weight of Tf is 0  $\mu\text{g}$ , 25  $\mu\text{g}$ , 50  $\mu\text{g}$  and 100  $\mu\text{g}$ , respectively. The molar of Tc is same as Tf, respectively.

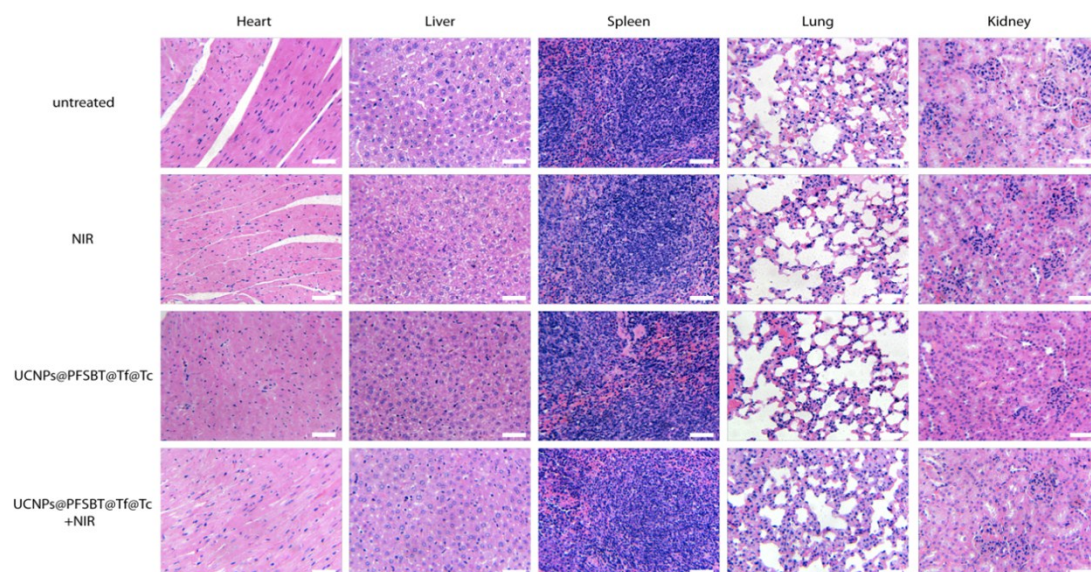

Fig. S3 H&E stained images of heart, liver, spleen, lung, and kidney collected from different major groups at 14 day after treatment. The scale bars in all images correspond to 50  $\mu\text{m}$ .
